# Supplementary material for: A Dengue Vaccine: Will It be Accepted and Is It Feasible? Lessons from Barranquilla, Colombia, and Merida, Venezuela
Source: PubMed Central journal article supplement (PMC6843364; doi:10.3390/microorganisms7100458), 2019-10-16
Supplement: microorganisms-07-00458-s001.pdf [file microorganisms-07-00458-s001.pdf]

**Table S1:** Baseline demographics of patient, health professional and government official survey respondents. NA - not applicable (the question was not posed to this survey group)

|                            | <b>Patients</b>     | <b>Health Professionals</b> | <b>Government Officials</b> |
|----------------------------|---------------------|-----------------------------|-----------------------------|
| <b>Colombia</b>            | (n=191)             | (n=56)                      | (n=20)                      |
| Age (mean)                 | 39 (18-76)          | NA                          | NA                          |
| Female                     | n=187<br>93 (49.2%) | 34 (65%)                    | 5 (25.0%)                   |
| Education Level            |                     |                             | (n=18)                      |
| Did Not Finish High School | 11 (5.8%)           | 0 (0%)                      | 1 (5.6%)                    |
| High School                | 60 (31.4%)          | 2 (3.6%)                    | 3 (16.7%)                   |
| Some College               | 24 (12.6%)          | 1 (1.8%)                    | 0 (0%)                      |
| College                    | 81 (42.4%)          | 41 (74.5%)                  | 6 (33.3%)                   |
| Graduate education         | 17 (8.9%)           | 11 (20.0%)                  | 8 (44.4%)                   |
| Position                   |                     |                             |                             |
| Nurse                      | NA                  | 25 (45%)                    | NA                          |
| Doctor                     | NA                  | 14 (27%)                    | NA                          |
| Other                      | NA                  | 16 (29%)                    | NA                          |
|                            | <b>Patients</b>     | <b>Health Professionals</b> | <b>Government Officials</b> |
| <b>Venezuela</b>           | (n=160)             | (n=141)                     | (n=6)                       |
| Age                        | 41 (18-78)          | NA                          | NA                          |
| Female                     | 117 (73.1%)         | 84 (59.6%)                  | 3 (50.0%)                   |
| Education Level            | (n=159)             |                             |                             |
| Did Not Finish High School | 22 (13.8%)          | 0 (0%)                      | 0 (0%)                      |
| High School                | 57 (35.8%)          | 0 (0%)                      | 0 (0%)                      |
| Some College               | 34 (21.4%)          | 0 (0%)                      | 0 (0%)                      |
| College                    | 39 (24.5%)          | 11 (8.1%)                   | 1 (16.7%)                   |
| Graduate education         | 7 (4.4%)            | 127 (93.4%)                 | 5 (83.3%)                   |
| Position                   |                     | (n=139)                     |                             |
| Nurse                      | NA                  | 9 (6.5%)                    | NA                          |
| Doctor                     | NA                  | 128 (92.1%)                 | NA                          |
| Other                      | NA                  | 2 (1.4%)                    | NA                          |

**Table S2:** Dengue incidence/severity as self-reported by patients

|                                                      | <b>Colombia</b><br>(n=191) | <b>Venezuela</b><br>(n=157) |
|------------------------------------------------------|----------------------------|-----------------------------|
| Reported having dengue                               | 62 (32.5%)                 | 43 (27.4%)                  |
| Number of illness bouts (avg, range)                 | 1.2 (1-2)                  | 1.2 (1-3)                   |
| Reported to be lab confirmed                         | 42 (67.7%)                 | 41 (95.3%)<br>n=43          |
| Hospitalized                                         | 22 (35.4%)                 | 8 (18.6%)<br>n=43           |
| Missed work/school                                   | 27 (43.5%)                 | 51 (75.0%)<br>n=68          |
| Average number of days missed                        | 8                          | 12.5                        |
| Family member missed work/school to care for patient | 12 (6.3%)<br>n=191         | 36 (23.1%)<br>n=156         |
| Household member treated for dengue                  | 43 (24.0%)<br>n=179        | 58 (36.5%)<br>n=159         |
| Number of times (average, range)                     | 1.2 (1-3)                  | 1.6 (1-4)                   |
